# Supplementary material for: Do health economic evaluations using observational data provide reliable assessment of treatment effects?
Source: PubMed Central journal article supplement (PMC3848127; doi:10.1186/2191-1991-3-21), 2013-09-19
Supplement: 2191-1991-3-21-S1.pdf [file 2191-1991-3-21-S1.pdf]

## Structured template used for the review

| General information                                                     |                                                                                                                                                                                                                                                                                                                                            |
|-------------------------------------------------------------------------|--------------------------------------------------------------------------------------------------------------------------------------------------------------------------------------------------------------------------------------------------------------------------------------------------------------------------------------------|
| Bibliographic information:                                              |                                                                                                                                                                                                                                                                                                                                            |
| Country:                                                                |                                                                                                                                                                                                                                                                                                                                            |
| Funding:                                                                | <input type="checkbox"/> Industry<br><input type="checkbox"/> Non-industry<br><input type="checkbox"/> Not stated                                                                                                                                                                                                                          |
| Type of Study:                                                          | <input type="checkbox"/> CEA <input type="checkbox"/> CUA <input type="checkbox"/> CBA                                                                                                                                                                                                                                                     |
| Summary Measure:                                                        | <input type="checkbox"/> Net-Benefit<br><input type="checkbox"/> ICER<br><input type="checkbox"/> Costs and effects separately                                                                                                                                                                                                             |
| Disease(s):                                                             |                                                                                                                                                                                                                                                                                                                                            |
| Intervention(s):                                                        |                                                                                                                                                                                                                                                                                                                                            |
| Category of Intervention(s):<br><i>(check all that apply)</i>           | <input type="checkbox"/> Surgical<br><input type="checkbox"/> Diagnostic<br><input type="checkbox"/> Medical<br><input type="checkbox"/> Preventative<br><input type="checkbox"/> Rehabilitation<br><input type="checkbox"/> Public health policy                                                                                          |
| Outcome(s):                                                             |                                                                                                                                                                                                                                                                                                                                            |
| Name(s) of Dataset(s):                                                  |                                                                                                                                                                                                                                                                                                                                            |
| Design / Sample Size / Type of Data:                                    |                                                                                                                                                                                                                                                                                                                                            |
| Analytical approaches                                                   |                                                                                                                                                                                                                                                                                                                                            |
| Method(s) for handling selection bias:<br><i>(check all that apply)</i> | <input type="checkbox"/> Regression analysis<br><input type="checkbox"/> Matching<br><input type="checkbox"/> Propensity scores<br><input type="checkbox"/> Instrumental variables<br><input type="checkbox"/> Difference-in-differences<br><input type="checkbox"/> Control function<br><input type="checkbox"/> Regression discontinuity |
| Adjustment performed on:<br><i>(check all that apply)</i>               | <input type="checkbox"/> Costs<br><input type="checkbox"/> Effects<br><input type="checkbox"/> Costs and Effects<br><input type="checkbox"/> Net-Benefit<br><input type="checkbox"/> Not stated                                                                                                                                            |

|                                                                                                                                                                                                                                                                                                                                                                                                                                                                                                                                                                                                 |                                                                                     |
|-------------------------------------------------------------------------------------------------------------------------------------------------------------------------------------------------------------------------------------------------------------------------------------------------------------------------------------------------------------------------------------------------------------------------------------------------------------------------------------------------------------------------------------------------------------------------------------------------|-------------------------------------------------------------------------------------|
| Estimation method(s):                                                                                                                                                                                                                                                                                                                                                                                                                                                                                                                                                                           |                                                                                     |
| Treatment effect (T.E):                                                                                                                                                                                                                                                                                                                                                                                                                                                                                                                                                                         |                                                                                     |
| Software used:                                                                                                                                                                                                                                                                                                                                                                                                                                                                                                                                                                                  | <input type="checkbox"/> Reported (specify):<br><input type="checkbox"/> Not stated |
| Handling of Uncertainty:                                                                                                                                                                                                                                                                                                                                                                                                                                                                                                                                                                        |                                                                                     |
| Comparisons                                                                                                                                                                                                                                                                                                                                                                                                                                                                                                                                                                                     |                                                                                     |
| Conclusions concerning the methods used for handling selection bias:                                                                                                                                                                                                                                                                                                                                                                                                                                                                                                                            |                                                                                     |
| <p>Reviewer's appraisal</p> <p><i>Was any justification provided for the method used?</i></p> <input type="checkbox"/> No <input type="checkbox"/> Yes (specify): <p><i>Was any justification provided for the specification used?</i></p> <input type="checkbox"/> No <input type="checkbox"/> Yes (specify): <p><i>Has the analysis reported the use of any alternative specifications?</i></p> <input type="checkbox"/> No <input type="checkbox"/> Yes (specify): <p><i>Have appropriate tests been undertaken?</i></p> <input type="checkbox"/> No <input type="checkbox"/> Yes (specify): |                                                                                     |
| Comments:                                                                                                                                                                                                                                                                                                                                                                                                                                                                                                                                                                                       |                                                                                     |
